# Supplementary material for: Identification of long noncoding RNAs dysregulated in the midbrain of human cocaine abusers
Source: PubMed Central journal article supplement (PMC4830632; doi:10.1111/jnc.13255), 2015-09-01
Supplement: NIHMS774227-supplement-Supp_Info.pdf [file NIHMS774227-supplement-Supp_Info.pdf]

## **Identification of long noncoding RNAs dysregulated in the midbrain of human cocaine abusers**

Michael J. Bannon\*, Candace L. Savonen\*, Hui Jia<sup>†</sup>, Fabien Dachet<sup>‡</sup>, Steven D. Halter\*, Carl J Schmidt<sup>¶</sup>, Leonard Lipovich<sup>†‡</sup>, and Gregory Kapatos\*<sup>†</sup>

\*Department of Pharmacology, Wayne State University School of Medicine

<sup>†</sup>Center for Molecular Medicine and Genetics, Wayne State University School of Medicine

<sup>‡</sup>Department of Neurology, Wayne State University School of Medicine, Detroit, Michigan, USA

<sup>¶</sup>Department of Pathology, University of Michigan, Ann Arbor, Michigan, USA.

### **Supplementary Information Figures and Tables**

**Figure S1.** Criteria used for selection of lncRNAs for further analyses.

**Table S1.** Sequences of primers used for qPCR validation and of riboprobes used for in situ hybridization histochemistry.

**Table S2.** Absence of correlation between cocaine metabolite benzoylecgonine and differentially expressed lncRNAs from Table 2.

**Table S3.** Gene ontology terms associated with the lncRNA dataset in Table 2.

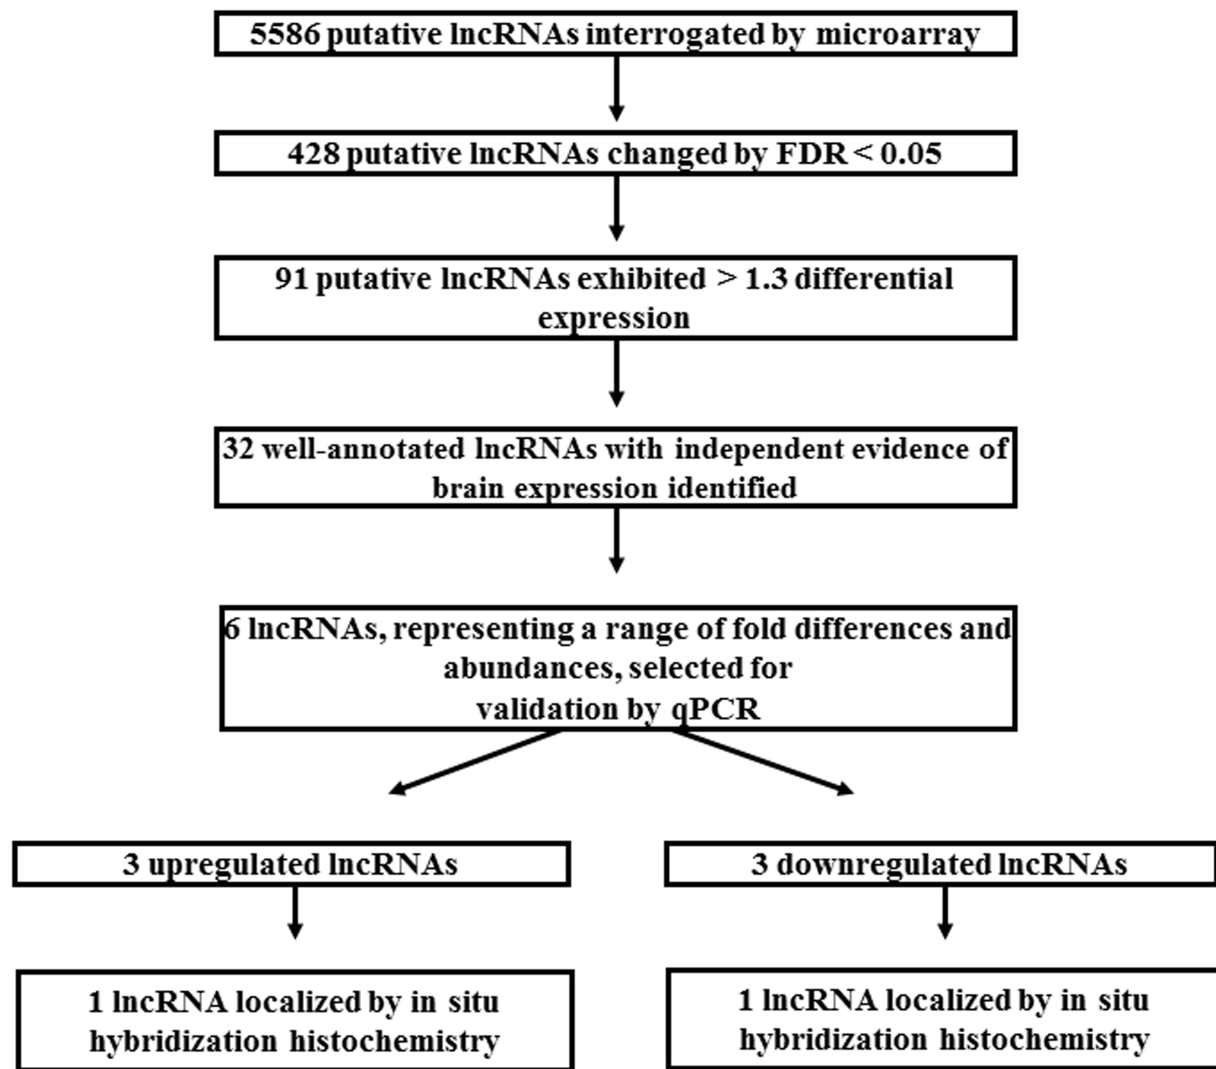

**Supplementary Figure 1.** Criteria used for selection for lncRNAs for further analyses.

**Supplementary Table 1.** Sequences of primers used for qPCR validation and of riboprobes used for in situ hybridization histochemistry.

| <b>RNA</b>                         | <b>Forward (5'-3')</b>                                                                                                                                                            | <b>Reverse (5'-3')</b> | <b>RefSeq ID</b>                                |
|------------------------------------|-----------------------------------------------------------------------------------------------------------------------------------------------------------------------------------|------------------------|-------------------------------------------------|
| <b>LINC00162</b>                   | GTCCTTTTCCTTGAGTAGGG                                                                                                                                                              | AAACATTTCTCTGTTTTTTCAC | NR_024089.2                                     |
| <b>LINC01314</b>                   | GAAGGACAAACAGCCTCTGC                                                                                                                                                              | GGATTCTCAGGCAGTGCTTC   | NR_120317.1                                     |
| <b>LOC643764</b>                   | GCCTCTTTTGTGCTGTGA                                                                                                                                                                | GCAACCTGTGCCTTTGAAAT   | NR_027378.1                                     |
| <b>LOC100507534</b>                | ACTAAGGAATCTGGGAGCTG                                                                                                                                                              | TGAATGGGGTAACCACTATG   | NR_110649.1                                     |
| <b>RP1-212P9.2</b>                 | ACAGCCTGGAAAGGAAGAAG                                                                                                                                                              | ACCACAGCAATGAAGTGGAC   | BC042916.1*                                     |
| <b>TRAF3IP2-AS1</b>                | GCTGGGTACAGAGGTGATTC                                                                                                                                                              | AAATTAACCAGGTGTGGTGG   | NR_34108.1<br>NR_34109.1                        |
| <b>TRAF3IP2</b>                    | GGGGATGTAGGCTAGAATTG                                                                                                                                                              | AGAGATGCTTTTGTCCATGT   | NM_000164281.2<br>NM_001164283.2<br>NM_147686.3 |
| <b>Riboprobe Sequences (5'-3')</b> |                                                                                                                                                                                   |                        | <b>RefSeq ID</b>                                |
| <b>LINC00162</b>                   | AAACAUUUCUCUGUUUUCACUCAUGACUGAGCUUUCUCCAUUCGGCC<br>GUGGCCCCACGUGUAGCAGGCACCUGCAGGCUGCCCAUCUUCAC<br>CACAUGUGCUCUCCACCUAAGCAAUGCAGAGAGGCCCGCUGUGGGG<br>GUCGUCCUACUCAAGGAAAAGGAC     |                        | NR_024089.2                                     |
| <b>SLC6A3 (DAT)</b>                | CAAGUGUCCUGCUUGGUUAGCUGUGCAGAAGGUGAAAUGGAGG<br>AAACCACAAAUUC AUGCAAAGUCCUUCUCCGAUGCGUGGCUCCCA<br>GCAGAGGCCGUAAAUGAGCGUUCAGUUGACACAUUGCACACACA<br>GUCUGUUCAGAGGCAU                 |                        | NM_001044.4                                     |
| <b>TRAF3IP2-AS1</b>                | AAAUUAACCAGGUGUGGUGGUGCAUGCCUGUGGUCCCAACAAUA<br>UGGGAGGCUAAGGUGGGAGGAAGACCUGAUCCCAGGAGGGCAAG<br>GUAGUUGUAUGUCCUGGGAAUCACCUCUGUACCCAGCUCUAGCC<br>CACCAUGCUUACCCAGGCACAUGUUCUCACCCU |                        | NR_34108.1,<br>NR_34109.1                       |
| <b>TRAF3IP2</b>                    | AGAGAUGC UUUUGUCCAUGUCAUUUUAUAAAUGAGUCCCUGGAA<br>UCUAAGAAAAGUUAAGGACUUGC UAAAGGUCAUACAGCUAAU<br>GGUGGUAGAACCAAAAUAAGAACACAGACUACAAUUCUAGCCUAC<br>AUCCCC                           |                        | NM_000164281.2<br>NM_001164283.2<br>NM_147686.3 |

\*No associated NCBI RefSeq Gene ID.

**Supplementary Table 2.** Absence of correlation between cocaine metabolite benzoylecgonine and the differentially expressed lncRNAs from Table 2.

|                         | <b>AC083843.1</b>   | <b>AFAP1AS1</b>      | <b>AP001505.9</b>   | <b>HOTAIRM1</b>     | <b>LINC00162</b>     | <b>LINC00403</b>     | <b>LINC00540</b>    | <b>LINC00645</b>     |
|-------------------------|---------------------|----------------------|---------------------|---------------------|----------------------|----------------------|---------------------|----------------------|
| Correlation Coefficient | -.144               | .220                 | .270                | -.402               | .349                 | -.119                | -.427               | .229                 |
| p-value 2 tailed        | .672                | .517                 | .422                | .221                | .293                 | .728                 | .190                | .499                 |
|                         | <b>RNF219-AS1</b>   | <b>RP11-109G23.3</b> | <b>RP11-23P13.6</b> | <b>RP11-309G3.3</b> | <b>RP11-388C12.1</b> | <b>RP11-421016.2</b> | <b>RP11-49I11.1</b> | <b>RP11-539L10.3</b> |
| Correlation Coefficient | .085                | .150                 | -.446               | .248                | -.346                | -.533                | -.397               | -.342                |
| p-value 2 tailed        | .805                | .660                 | .169                | .462                | .297                 | .092                 | .227                | .303                 |
|                         | <b>LINC01010</b>    | <b>LINC01314</b>     | <b>LOC100507140</b> | <b>LOC100507534</b> | <b>LOC101929176</b>  | <b>LOC400548</b>     | <b>LOC643763</b>    | <b>PRKCQ-AS1</b>     |
| Correlation Coefficient | .698*               | .180                 | .472                | -.248               | -.409                | -.191                | .160                | .221                 |
| p-value 2 tailed        | .017                | .596                 | .142                | .463                | .211                 | .573                 | .638                | .513                 |
|                         | <b>RP11-552F3.9</b> | <b>RP11-553L6.5</b>  | <b>RP1-212P9.2</b>  | <b>RP4-809F18.2</b> | <b>RPPH1</b>         | <b>STX18-AS1</b>     | <b>TRAF3IP2-AS1</b> | <b>WDR11-AS1</b>     |
| Correlation Coefficient | -.297               | .210                 | -.346               | -.425               | .094                 | .459                 | -.044               | -.578                |
| p-value 2 tailed        | .375                | .535                 | .298                | .192                | .783                 | .156                 | .899                | .063                 |

\* p &lt; 0.05 level (2-tailed).

**Supplementary Table 3.** Gene ontology terms associated with the lncRNA dataset in Table 2.

| <b>GO term name</b>                                   | <b>P-value</b> | <b>Corrected P-value</b> |
|-------------------------------------------------------|----------------|--------------------------|
| <b>Cellular Component</b>                             |                |                          |
| synapse                                               | 5.5196E-19     | 3.2587E-15               |
| synapse part                                          | 4.3166E-18     | 2.3361E-14               |
| neuron part                                           | 1.4826E-15     | 6.8774E-12               |
| cell projection                                       | 3.4645E-14     | 1.2500E-10               |
| neuron projection                                     | 4.9304E-14     | 1.5290E-10               |
| synaptic membrane                                     | 2.5252E-13     | 6.5598E-10               |
| integral to plasma membrane                           | 5.8535E-12     | 1.4621E-08               |
| intrinsic to plasma membrane                          | 6.8151E-11     | 1.4277E-07               |
| postsynaptic membrane                                 | 1.0176E-10     | 2.0651E-07               |
| ion channel complex                                   | 1.6452E-09     | 2.7397E-06               |
| plasma membrane                                       | 2.2484E-09     | 3.6504E-06               |
| cell projection part                                  | 2.8257E-09     | 4.4759E-06               |
| cell periphery                                        | 2.9574E-09     | 4.5730E-06               |
| synaptic vesicle                                      | 5.5280E-09     | 8.1592E-06               |
| nucleosome                                            | 3.3163E-08     | 3.7133E-05               |
| synaptic vesicle membrane                             | 5.2706E-08     | 5.7048E-05               |
| axon                                                  | 8.0479E-08     | 8.1665E-05               |
| acrosomal vesicle                                     | 1.3674E-07     | 1.3455E-04               |
| plasma membrane part                                  | 2.9958E-07     | 2.7794E-04               |
| chromatoid body                                       | 3.1370E-07     | 2.8694E-04               |
| <b>Molecular Function</b>                             |                |                          |
| passive transmembrane transporter activity            | 7.9432E-15     | 3.2241E-11               |
| channel activity                                      | 7.9432E-15     | 3.2241E-11               |
| substrate-specific channel activity                   | 1.7975E-14     | 6.8669E-11               |
| ion channel activity                                  | 3.9326E-14     | 1.3442E-10               |
| gated channel activity                                | 2.4321E-13     | 6.5598E-10               |
| ion gated channel activity                            | 2.4321E-13     | 6.5598E-10               |
| metal ion transmembrane transporter activity          | 2.2322E-10     | 4.3929E-07               |
| GABA receptor activity                                | 3.2193E-10     | 6.1491E-07               |
| voltage-gated ion channel activity                    | 7.3777E-10     | 1.3309E-06               |
| voltage-gated channel activity                        | 7.3777E-10     | 1.3309E-06               |
| GABA-A receptor activity                              | 1.4608E-09     | 2.4965E-06               |
| ion transmembrane transporter activity                | 5.4990E-09     | 8.1592E-06               |
| voltage-gated cation channel activity                 | 1.0745E-08     | 1.4241E-05               |
| inorganic cation transmembrane transporter activity   | 2.5887E-08     | 3.0021E-05               |
| cation channel activity                               | 2.5625E-08     | 3.0021E-05               |
| transmembrane transporter activity                    | 2.8241E-08     | 3.2177E-05               |
| monovalent inorganic cation transmembrane transporter | 7.7443E-08     | 8.1037E-05               |
| sodium ion transmembrane transporter activity         | 1.2624E-07     | 1.2613E-04               |
| substrate-specific transmembrane transporter activity | 2.0601E-07     | 1.9675E-04               |
| transmembrane signaling receptor activity             | 6.4895E-07     | 5.3348E-04               |

Results obtained using the LncRNA2Function database (See Materials and Methods). Top 20 terms are shown.
